# Supplementary material for: Modeling Neuroimmune Interactions in Human Subjects and Animal Models to Predict Subtype-Specific Multidrug Treatments for Gulf War Illness
Source: MDPI journal article supplement (doi:10.3390/ijms22168546), 2021-08-09
Supplement: s1 [file s1]

# Modeling Neuroimmune Interactions in Human Subjects and Animal Models to Predict Subtype Specific Multidrug Treatments for Gulf War Illness

Francisco J. C. Arias, Kristina Aenlle, Maria Abreu, Mary A. Holschbach, Lindsay T. Michalovicz, Kimberly A. Kelly, Nancy Klimas, James O'Callaghan, Travis J. A. Craddock

## Supplementary Information

Table S1. Human plasma cytokine levels normalized mean  $\pm$  SEM

| Group   | IL-1a | IL-1b | IL-2  | IL-4  | IL-5  | IL-6  | IL-8  | IL-10 | IL-12 | IFNy  | TNFa  |
|---------|-------|-------|-------|-------|-------|-------|-------|-------|-------|-------|-------|
| Mean    |       |       |       |       |       |       |       |       |       |       |       |
| HC      | 0.133 | 0.134 | 0.076 | 0.207 | 0.075 | 0.117 | 0.039 | 0.152 | 0.103 | 0.230 | 0.111 |
| GWIL T0 | 0.096 | 0.083 | 0.088 | 0.200 | 0.084 | 0.194 | 0.085 | 0.103 | 0.065 | 0.249 | 0.088 |
| GWIH T0 | 0.109 | 0.150 | 0.052 | 0.184 | 0.042 | 0.089 | 0.097 | 0.077 | 0.065 | 0.260 | 0.136 |
| GWIL T1 | 0.084 | 0.198 | 0.083 | 0.125 | 0.066 | 0.159 | 0.253 | 0.114 | 0.161 | 0.321 | 0.187 |
| GWIH T1 | 0.107 | 0.296 | 0.056 | 0.137 | 0.064 | 0.135 | 0.255 | 0.110 | 0.127 | 0.323 | 0.208 |
| SEM     |       |       |       |       |       |       |       |       |       |       |       |
| HC      | 0.030 | 0.025 | 0.028 | 0.032 | 0.028 | 0.027 | 0.005 | 0.037 | 0.035 | 0.017 | 0.024 |
| GWIL T0 | 0.021 | 0.012 | 0.036 | 0.036 | 0.042 | 0.055 | 0.036 | 0.035 | 0.016 | 0.021 | 0.014 |
| GWIH T0 | 0.018 | 0.042 | 0.009 | 0.026 | 0.006 | 0.011 | 0.030 | 0.015 | 0.012 | 0.034 | 0.028 |
| GWIL T1 | 0.014 | 0.047 | 0.043 | 0.009 | 0.042 | 0.051 | 0.048 | 0.045 | 0.048 | 0.036 | 0.024 |
| GWIH T1 | 0.032 | 0.051 | 0.013 | 0.019 | 0.018 | 0.037 | 0.034 | 0.019 | 0.017 | 0.039 | 0.036 |

Table S2. Mouse serum cytokine levels in pg/mL  $\pm$  SEM.

| Group            | mIFNy                 | mIL-1a            | mIL-1b             | mIL-2                | mIL-4             | mIL-5             |
|------------------|-----------------------|-------------------|--------------------|----------------------|-------------------|-------------------|
| Water Saline     | 9.98 $\pm$ 1.15       | 11.16 $\pm$ 2.76  | 29.99 $\pm$ 1.74   | 14.53 $\pm$ 1.18     | 7.98 $\pm$ 1.00   | 35.68 $\pm$ 2.77  |
| Water DFP Saline | 14.21 $\pm$ 6.69      | 11.79 $\pm$ 4.41  | 25.04 $\pm$ 0.24   | 15.66 $\pm$ 2.26     | 10.32 $\pm$ 0.33  | 31.75 $\pm$ 0.07  |
| Water DFP LPS    | 9.76 $\pm$ 1.37       | 33.84 $\pm$ 14.38 | 44.91 $\pm$ 6.93   | 18.04 $\pm$ 1.48     | 8.14 $\pm$ 0.18   | 40.15 $\pm$ 2.76  |
| CORT DFP Saline  | 10.43 $\pm$ 0.63      | 2.18 $\pm$ 0.04   | 29.86 $\pm$ 3.03   | 16.49 $\pm$ 1.82     | 7.82 $\pm$ 0.60   | 28.55 $\pm$ 0.52  |
| CORT DFP LPS     | 24.80 $\pm$ 3.16      | 96.38 $\pm$ 22.48 | 185.42 $\pm$ 30.52 | 25.28 $\pm$ 5.73     | 11.12 $\pm$ 2.24  | 99.58 $\pm$ 18.00 |
| Group            | mIL-6                 | mIL-10            | mIL-12             | mKC                  | mMIP-2            | mTNFa             |
| Water Saline     | 48.25 $\pm$ 27.74     | 3.92 $\pm$ 0.10   | 15.98 $\pm$ 1.00   | 42.14 $\pm$ 23.02    | 15.02 $\pm$ 0.68  | 3.04 $\pm$ 0.14   |
| Water DFP Saline | 18.09 $\pm$ 1.84      | 4.05 $\pm$ 0.38   | 18.22 $\pm$ 5.21   | 43.14 $\pm$ 20.25    | 14.92 $\pm$ 0.59  | 2.68 $\pm$ 0.30   |
| Water DFP LPS    | 997.73 $\pm$ 606.52   | 5.00 $\pm$ 0.78   | 14.20 $\pm$ 1.20   | 418.86 $\pm$ 187.08  | 16.01 $\pm$ 0.50  | 8.92 $\pm$ 3.72   |
| CORT DFP Saline  | 22.04 $\pm$ 3.36      | 3.87 $\pm$ 0.13   | 16.52 $\pm$ 1.29   | 39.25 $\pm$ 11.72    | 15.41 $\pm$ 0.87  | 3.51 $\pm$ 0.55   |
| CORT DFP LPS     | 9901.16 $\pm$ 1796.02 | 44.68 $\pm$ 6.73  | 16.38 $\pm$ 0.83   | 1971.15 $\pm$ 280.62 | 97.32 $\pm$ 17.56 | 38.79 $\pm$ 5.72  |

Table S3. Mouse cortex cytokine mRNA normalize expression changes against the GAPDH  $\pm$  SEM.

| Group               | CCL2             | IL6             | OSM             | TNFa             | LIF             | IL1b             |
|---------------------|------------------|-----------------|-----------------|------------------|-----------------|------------------|
| Water Saline Saline | 1.05 $\pm$ 0.16  | 1.00 $\pm$ 0.04 | 1.00 $\pm$ 0.02 | 1.01 $\pm$ 0.07  | 1.00 $\pm$ 0.06 | 1.02 $\pm$ 0.10  |
| Water DFP Saline    | 0.89 $\pm$ 0.01  | 1.00 $\pm$ 0.15 | 1.18 $\pm$ 0.02 | 0.86 $\pm$ 0.33  | 0.65 $\pm$ 0.28 | 1.14 $\pm$ 0.06  |
| Water DFP LPS       | 2.07 $\pm$ 1.17  | 0.79 $\pm$ 0.23 | 1.55 $\pm$ 0.50 | 5.58 $\pm$ 2.54  | 0.53 $\pm$ 0.15 | 5.00 $\pm$ 3.09  |
| CORT DFP Saline     | 0.69 $\pm$ 0.33  | 0.38 $\pm$ 0.16 | 0.90 $\pm$ 0.28 | 2.10 $\pm$ 1.49  | 0.22 $\pm$ 0.08 | 1.23 $\pm$ 0.83  |
| CORT DFP LPS        | 24.20 $\pm$ 4.03 | 1.82 $\pm$ 0.40 | 5.95 $\pm$ 0.61 | 35.06 $\pm$ 5.60 | 1.31 $\pm$ 0.55 | 85.88 $\pm$ 7.26 |

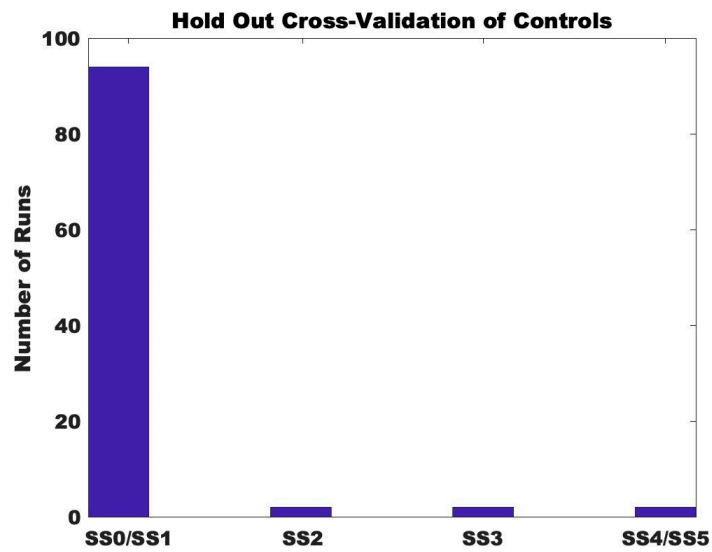

Figure S1: Hold-out cross validation was performed by randomly splitting the healthy control dataset evenly in two using the MATLAB function *cvpartition* then performing Brown's method as described in the main Methods section 4.8 to find the stable state (SS) with the closest alignment. This process was repeated 100 times. This resulted in a maximum of 94% of the runs finding that the test group aligned with the healthy stable state (SS0/SS1) with an even distribution of the remaining cases being assigned to the other alternate stable states.
